# Supplementary material for: An Evolutionary Model-Based Algorithm for Accurate Phylogenetic Breakpoint Mapping and Subtype Prediction in HIV-1
Source: PubMed Central journal article supplement (PMC2776870; doi:10.1371/journal.pcbi.1000581), 2009-11-26
Supplement: pcbi.1000581.s001.pdf [file pcbi.1000581.s001.pdf]

# 1 Parametric simulation scenarios

The top panel of each figure contains a graphical summary of SCUEAL results averaged over 100 replicates. The abscissa is labeled with sequence coordinates and the ordinate - with doubly averaged (Akaike weights model-average for each replicate and then arithmetic average over all replicates) support of having the query sequence cluster with a particular lineage in the tree at a given position in the alignment. Ancestral lineages are annotated by a slash separated list of all the daughter lineages (e.g. 7/8 is the parental lineage of 7 and 8). The dot plot indicates double averaged support for placing a breakpoint at a given position in the alignment.

There are also two tables in each plot. The first one is showing how many replicates were classified correctly, were a sub/superset of the correct mosaic, or were assigned a mismatched mosaic. For each category, the 'Better or Equal BIC/Delta(BIC)' column includes the number of replicates whose assigned mosaic had a better BIC than the generating mosaic, and the median (2.5%-97.5% range) of difference in BIC between the inferred and the correct mosaics. The second one tabulates how often each of the simulated breakpoints was found, and where it was placed by SCUEAL.

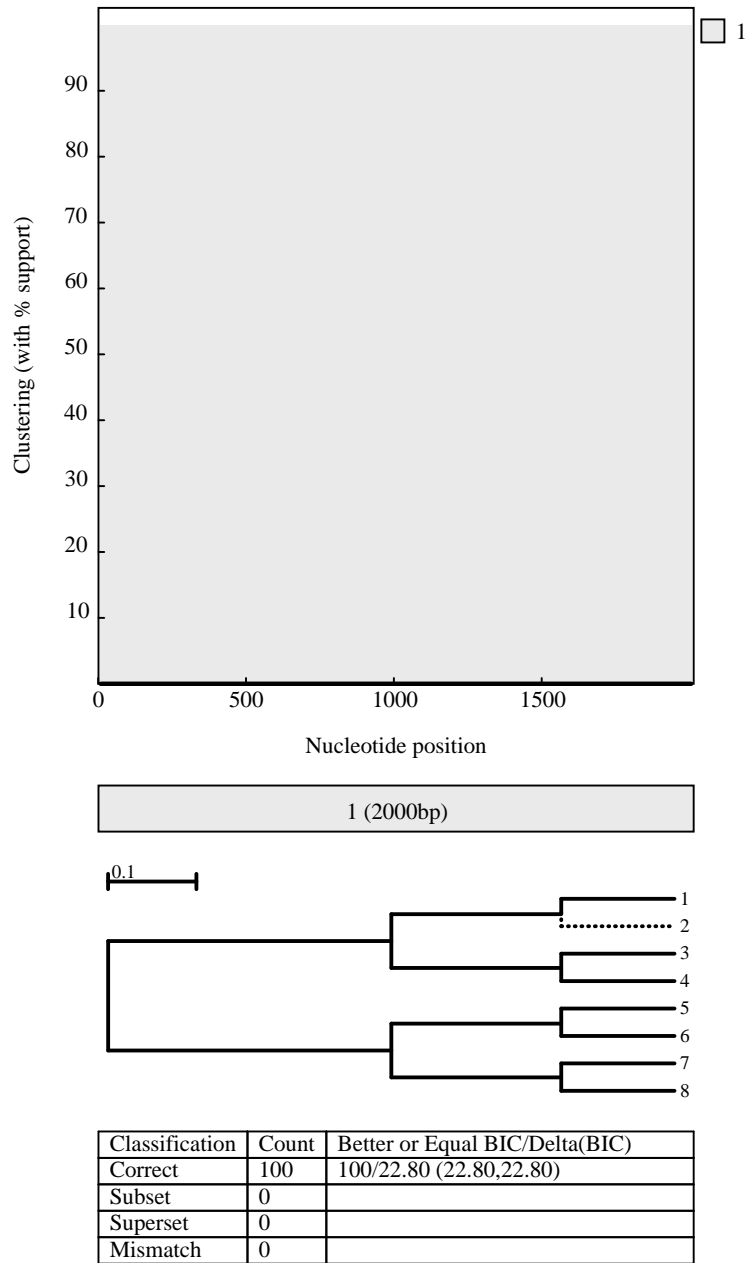

Figure S1: Scenario 1. No recombination

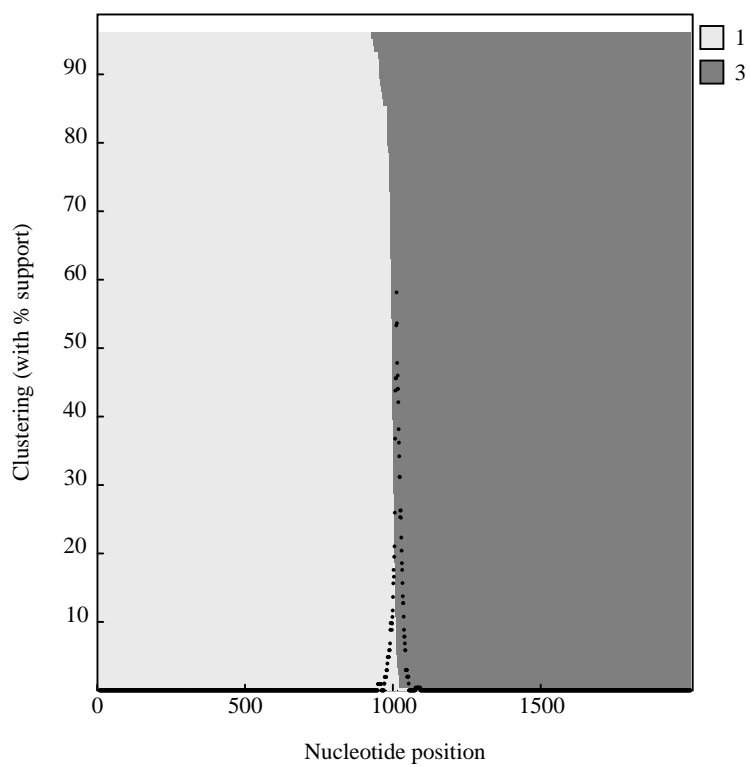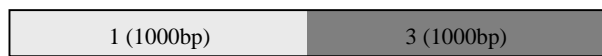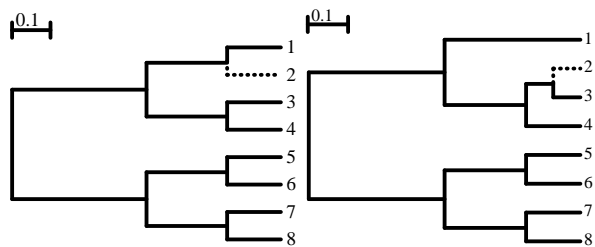

| Classification | Count | Better or Equal BIC/Delta(BIC) |
|----------------|-------|--------------------------------|
| Correct        | 100   | 88/ 0.80 (-0.44, 7.78)         |
| Subset         | 0     |                                |
| Superset       | 0     |                                |
| Mismatch       | 0     |                                |

  

| Breakpoint | Times found/ Location (median, st.dev (2.5%-97.5%)) |
|------------|-----------------------------------------------------|
| 1000bp 1:3 | 100/990,18.99 (931,1015)                            |

Figure S2: Scenario 2. An evident breakpoint/close

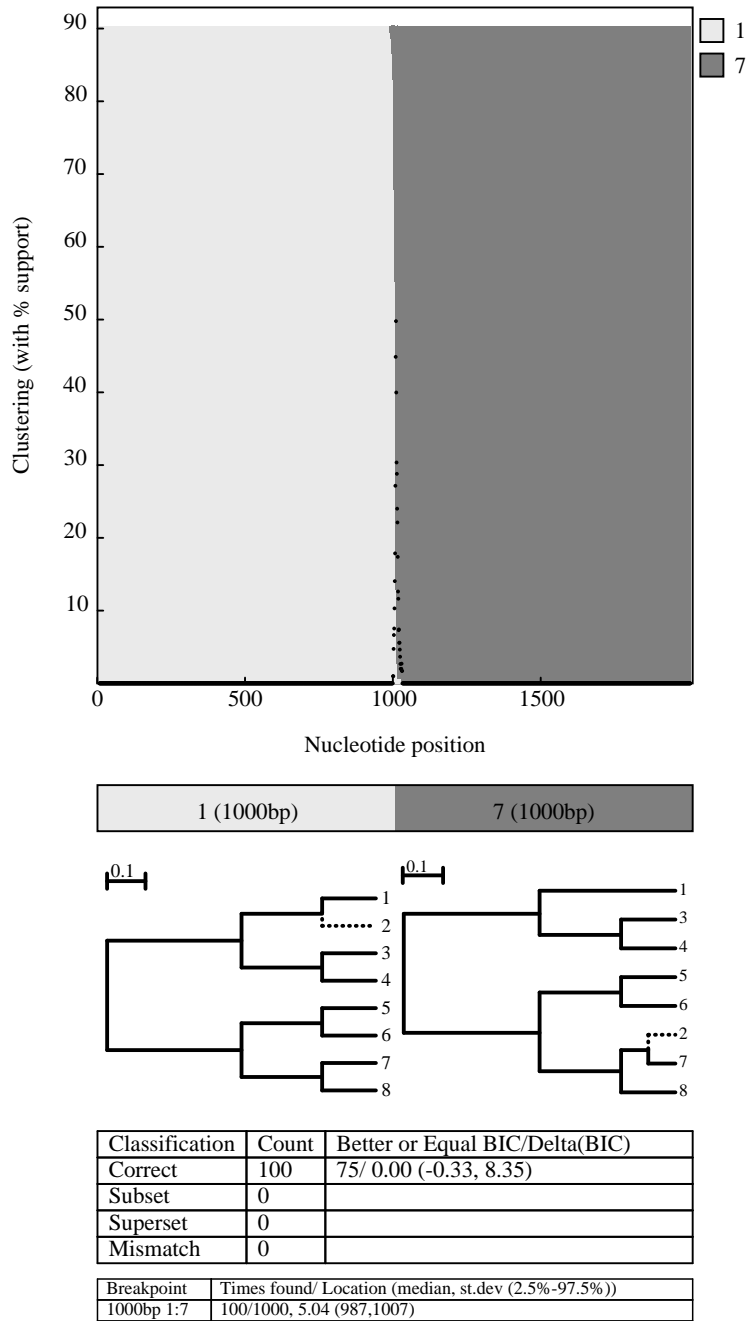

Figure S3: Scenario 2. An evident breakpoint/divergent

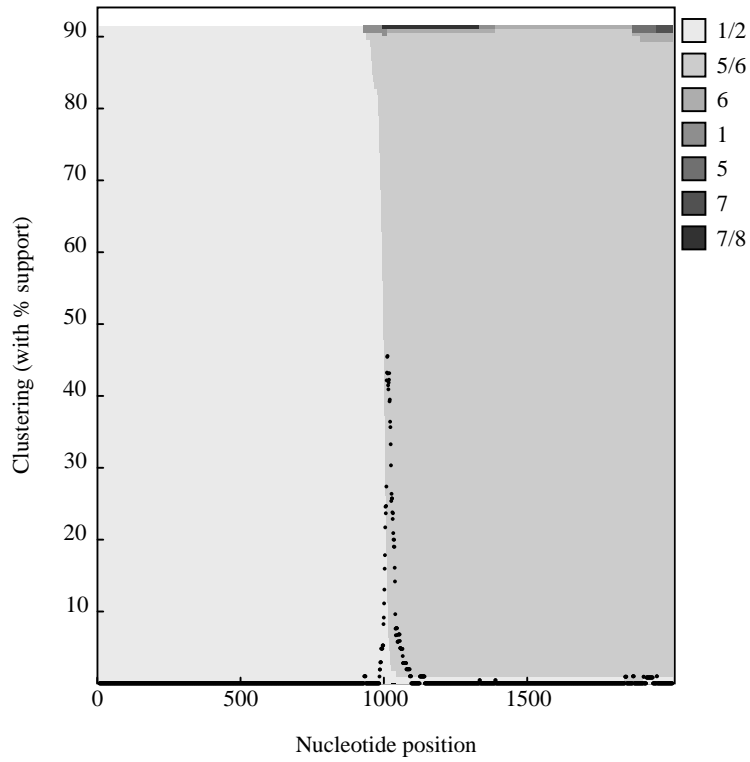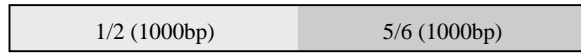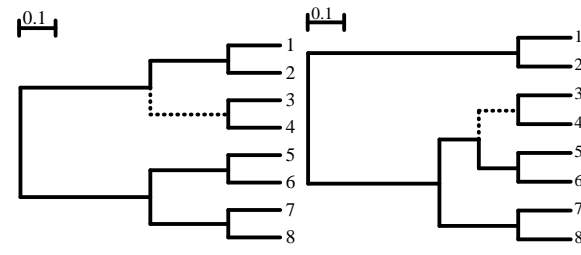

| Classification | Count | Better or Equal BIC/Delta(BIC) |
|----------------|-------|--------------------------------|
| Correct        | 92    | 86/ 1.69 (-0.04, 8.82)         |
| Subset         | 0     |                                |
| Superset       | 7     | 6/ 4.53 (-6.59,12.13)          |
| Mismatch       | 1     | 1/ 1.48 ( 1.48, 1.48)          |

| Breakpoint     | Times found/ Location (median, st.dev (2.5%-97.5%)) |
|----------------|-----------------------------------------------------|
| 1000bp 1/2:5/6 | 96/992,16.62 (947,1017)                             |

Figure S4: Scenario 2. An evident breakpoint/ancient

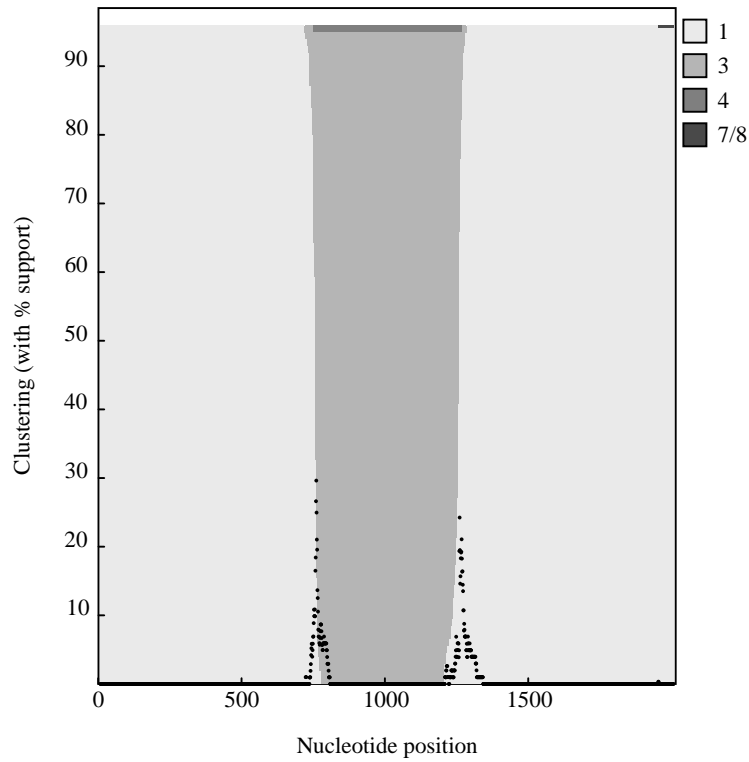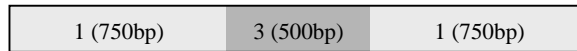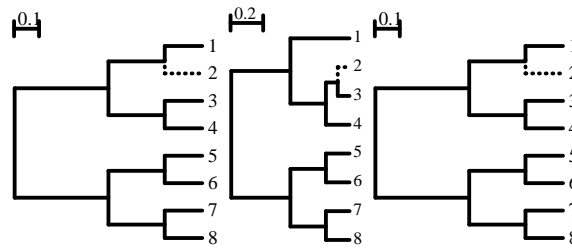

| Classification | Count | Better or Equal BIC/Delta(BIC) |
|----------------|-------|--------------------------------|
| Correct        | 98    | 96/ 4.00 ( 0.00,14.03)         |
| Subset         | 0     |                                |
| Superset       | 1     | 1/ 4.49 ( 4.49, 4.49)          |
| Mismatch       | 1     | 1/10.34 (10.34,10.34)          |

| Breakpoint | Times found/ Location (median, st.dev (2.5%-97.5%)) |
|------------|-----------------------------------------------------|
| 750bp 1:3  | 99/749,10.23 (720,769)                              |
| 1250bp 3:1 | 99/1251,15.26 (1201,1273)                           |

Figure S5: Scenario 3. Two evident breakpoints/close

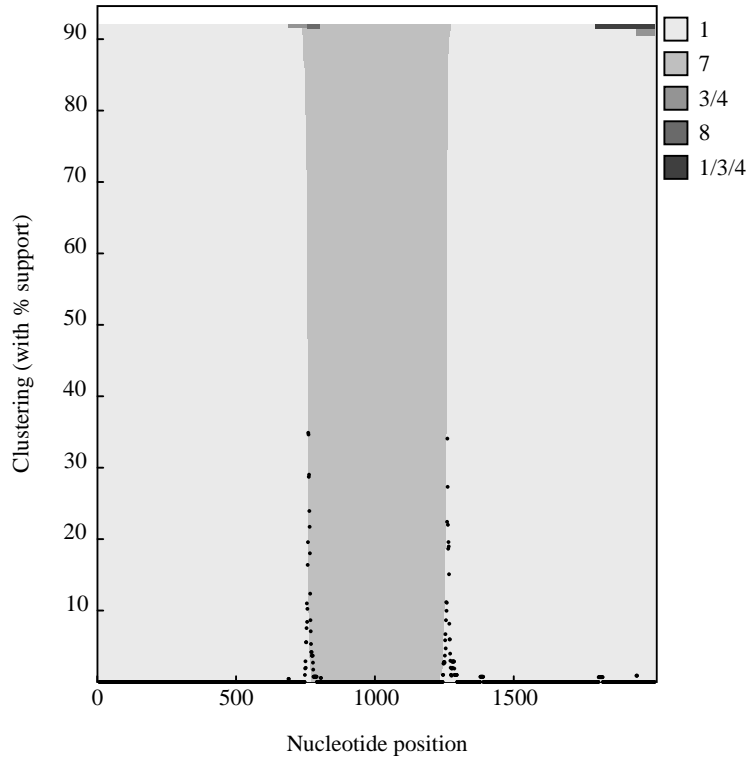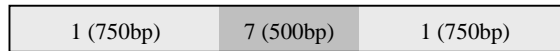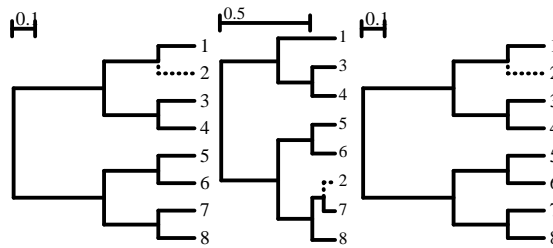

| Classification | Count | Better or Equal BIC/Delta(BIC) |
|----------------|-------|--------------------------------|
| Correct        | 95    | 89/ 2.13 (-0.12,10.38)         |
| Subset         | 0     |                                |
| Superset       | 5     | 5/ 6.75 ( 0.38,15.22)          |
| Mismatch       | 0     |                                |

| Breakpoint | Times found/ Location (median, st.dev (2.5%-97.5%)) |
|------------|-----------------------------------------------------|
| 750bp 1:7  | 98/751, 5.61 (735,762)                              |
| 1250bp 7:1 | 100/1251, 5.92 (1237,1265)                          |

Figure S6: Scenario 3. Two evident breakpoints/divergent

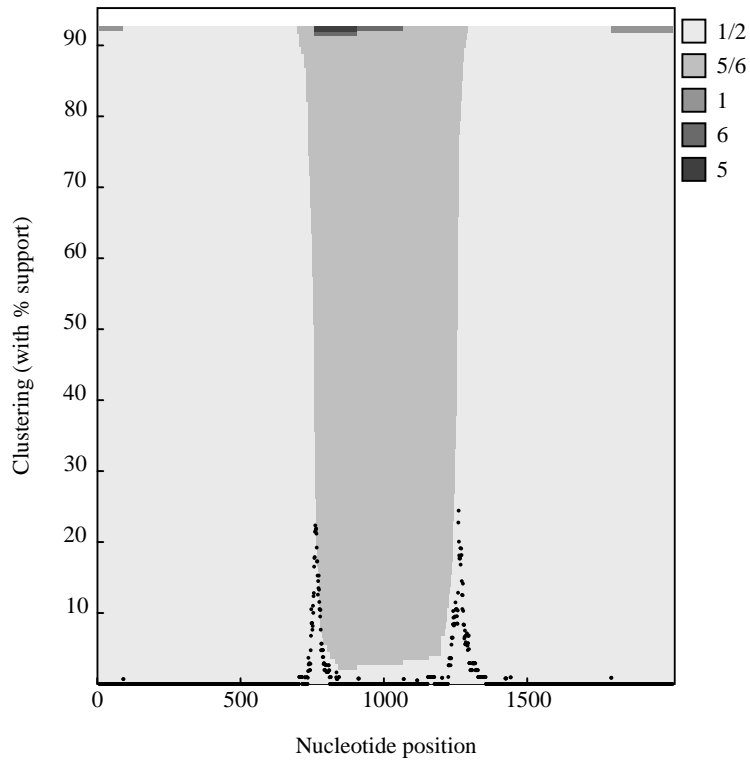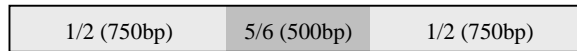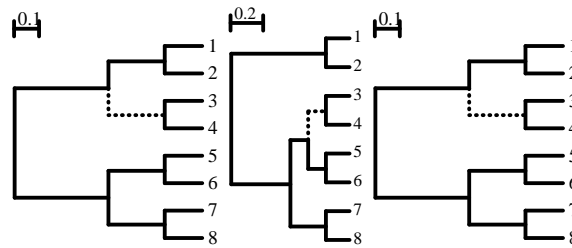

| Classification | Count | Better or Equal BIC/Delta(BIC) |
|----------------|-------|--------------------------------|
| Correct        | 91    | 90/ 4.10 ( 0.31,14.70)         |
| Subset         | 0     |                                |
| Superset       | 5     | 4/ 4.24 (-4.40,12.70)          |
| Mismatch       | 4     | 4/13.81 ( 0.67,15.30)          |

| Breakpoint     | Times found/ Location (median, st.dev (2.5%-97.5%)) |
|----------------|-----------------------------------------------------|
| 750bp 1/2:5/6  | 96/749,22.37 (697,824)                              |
| 1250bp 5/6:1/2 | 96/1250,20.09 (1192,1283)                           |

Figure S7: Scenario 3. Two evident breakpoints/ancient



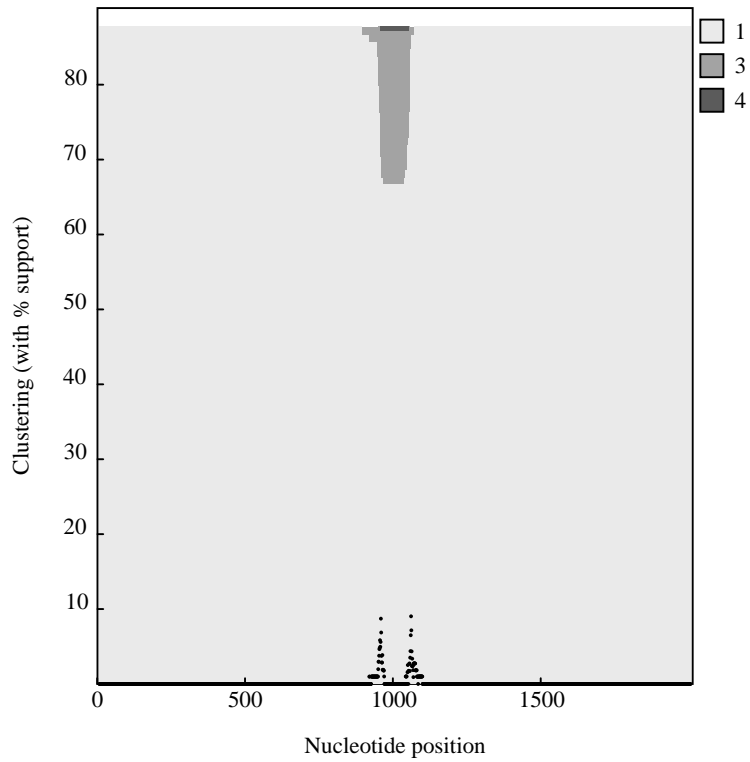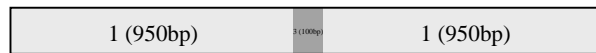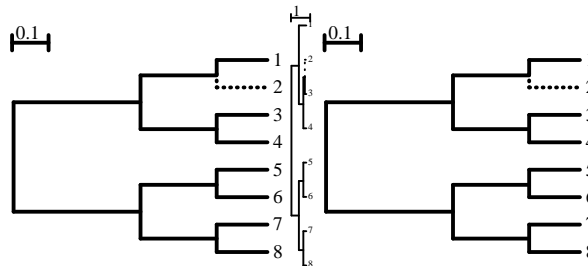

| Classification | Count | Better or Equal BIC/Delta(BIC) |
|----------------|-------|--------------------------------|
| Correct        | 22    | 21/ 3.03 (-0.01,15.19)         |
| Subset         | 77    | 76/16.45 ( 2.02,53.45)         |
| Superset       | 0     |                                |
| Mismatch       | 1     | 1/ 3.57 ( 3.57, 3.57)          |

| Breakpoint | Times found/ Location (median, st.dev (2.5%-97.5%)) |
|------------|-----------------------------------------------------|
| 950bp 1:3  | 22/948,15.35 (888,960)                              |
| 1050bp 3:1 | 22/1050, 7.77 (1031,1066)                           |

Figure S8: Scenario 4. Two closely-spaced breakpoints/close

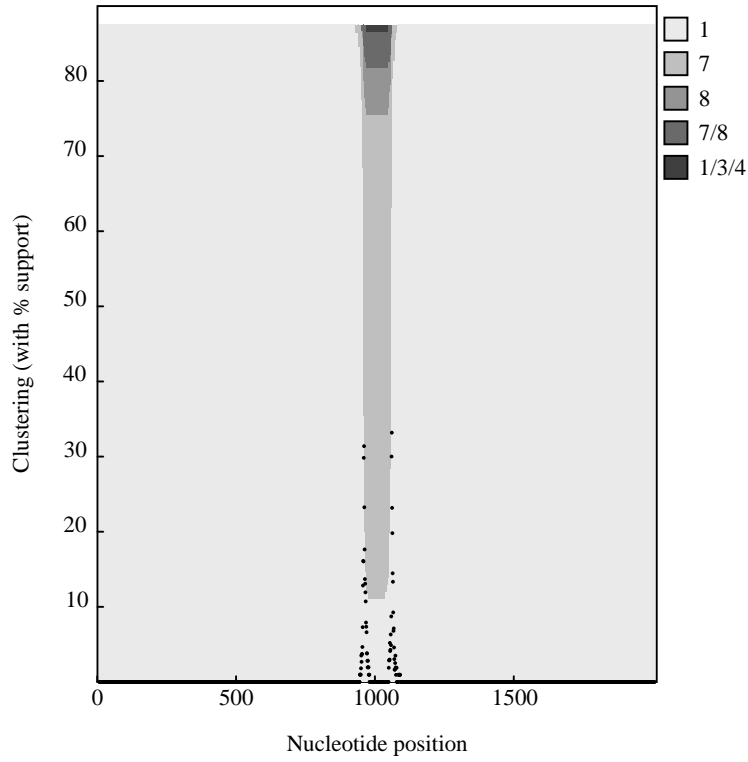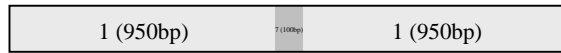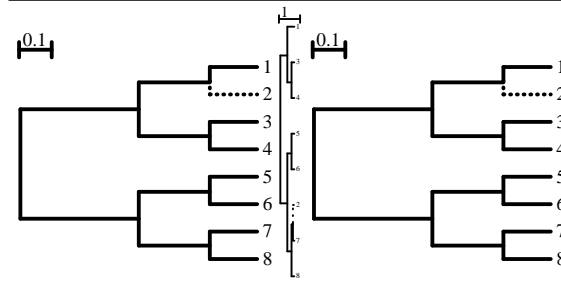

| Classification | Count | Better or Equal BIC/Delta(BIC) |
|----------------|-------|--------------------------------|
| Correct        | 73    | 69/ 2.23 (-0.27,10.36)         |
| Subset         | 11    | 0/-33.93 (-71.70,-23.49)       |
| Superset       | 0     |                                |
| Mismatch       | 16    | 15/ 4.37 (-0.28,14.95)         |

| Breakpoint | Times found/ Location (median, st.dev (2.5%-97.5%)) |
|------------|-----------------------------------------------------|
| 950bp 1:7  | 73/951, 6.40 (932,960)                              |
| 1050bp 7:1 | 73/1051, 5.79 (1038,1068)                           |

Figure S9: Scenario 3. Two closely-spaced breakpoints/divergent

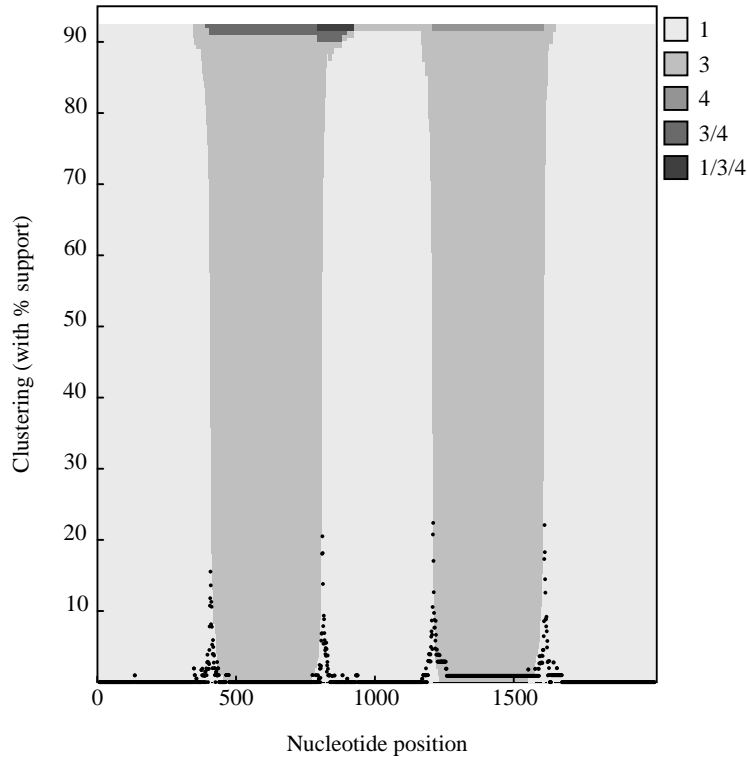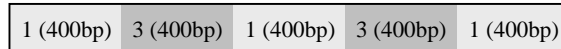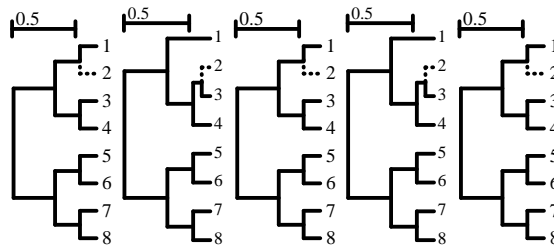

| Classification | Count | Better or Equal BIC/Delta(BIC) |
|----------------|-------|--------------------------------|
| Correct        | 96    | 96/ 8.51 ( 0.36,22.19)         |
| Subset         | 0     |                                |
| Superset       | 1     | 0/-15.08 (-15.08,-15.08)       |
| Mismatch       | 3     | 1/-0.53 (-12.70, 4.79)         |

| Breakpoint | Times found/ Location (median, st.dev (2.5%-97.5%)) |
|------------|-----------------------------------------------------|
| 400bp 1:3  | 98/399,16.86 (342,428)                              |
| 800bp 3:1  | 97/803, 9.63 (784,837)                              |
| 1200bp 1:3 | 98/1200,11.34 (1161,1220)                           |
| 1600bp 3:1 | 99/1602,12.24 (1570,1634)                           |

Figure S10: Scenario 5. Four breakpoints/close

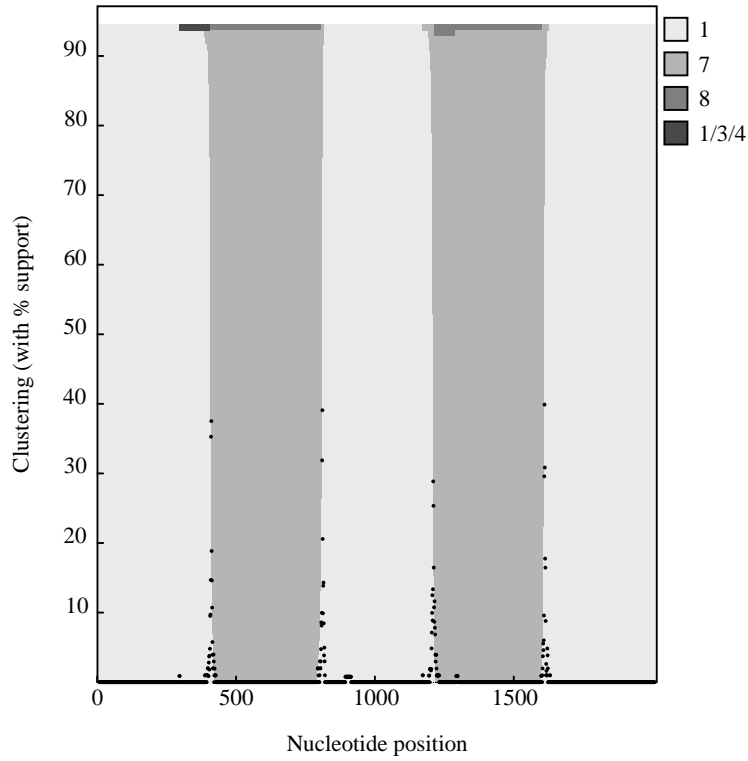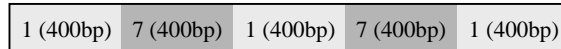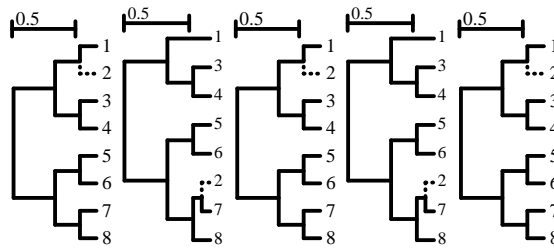

| Classification | Count | Better or Equal BIC/Delta(BIC) |
|----------------|-------|--------------------------------|
| Correct        | 95    | 95/ 5.25 ( 0.23,20.04)         |
| Subset         | 0     |                                |
| Superset       | 3     | 3/ 6.41 ( 2.06, 7.77)          |
| Mismatch       | 2     | 2/10.02 ( 5.48,14.57)          |

| Breakpoint | Times found/ Location (median, st.dev (2.5%-97.5%)) |
|------------|-----------------------------------------------------|
| 400bp 1:7  | 98/401, 5.15 (389,412)                              |
| 800bp 7:1  | 99/802, 4.57 (787,809)                              |
| 1200bp 1:7 | 98/1201, 5.77 (1187,1211)                           |
| 1600bp 7:1 | 99/1602, 4.21 (1594,1613)                           |

Figure S11: Scenario 5. Four breakpoints/divergent

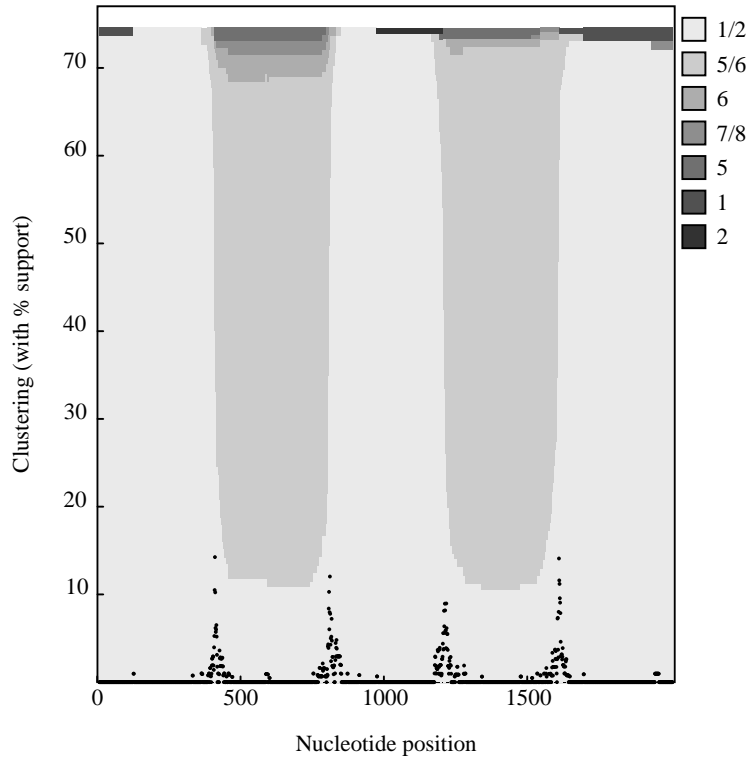

1/2 (400bp) 5/6 (400bp) 1/2 (400bp) 5/6 (400bp) 1/2 (400bp)

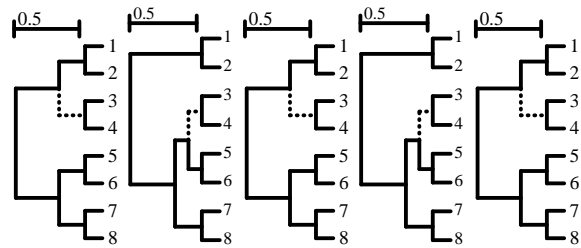

| Classification | Count | Better or Equal BIC/Delta(BIC) |
|----------------|-------|--------------------------------|
| Correct        | 54    | 54/ 8.67 ( 0.68,27.76)         |
| Subset         | 22    | 3/-18.30 (-56.79,10.70)        |
| Superset       | 4     | 4/ 7.68 ( 5.06, 9.92)          |
| Mismatch       | 20    | 19/15.53 (-1.85,26.39)         |

| Breakpoint     | Times found/ Location (median, st.dev (2.5%-97.5%)) |
|----------------|-----------------------------------------------------|
| 400bp 1/2:5/6  | 65/402,14.88 (357,434)                              |
| 800bp 5/6:1/2  | 67/802,15.74 (745,826)                              |
| 1200bp 1/2:5/6 | 69/1201,19.67 (1169,1270)                           |
| 1600bp 5/6:1/2 | 69/1602,18.04 (1550,1627)                           |

Figure S12: Scenario 5. Four breakpoints/ancient

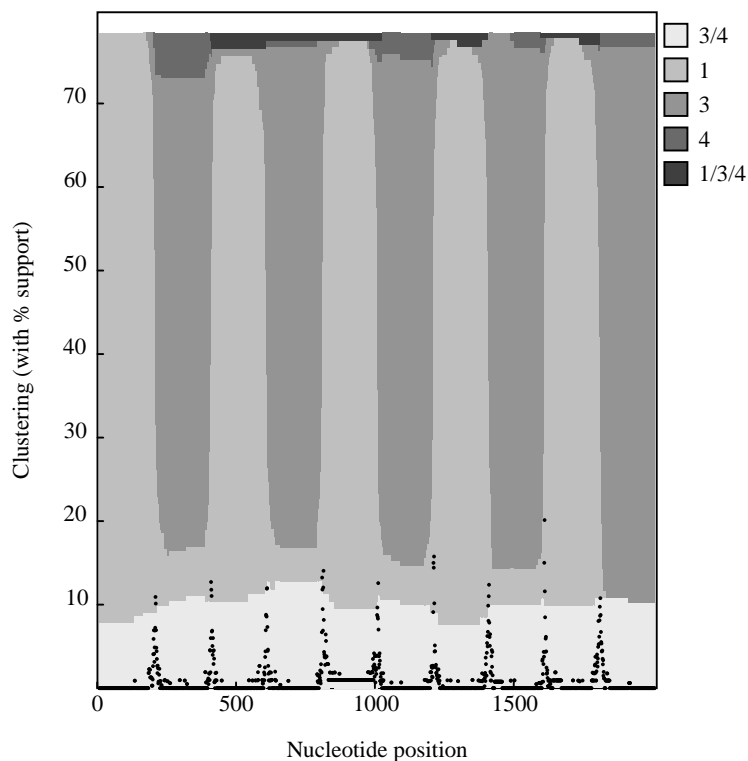

1 (200bp)3 (200bp)1 (200bp)3 (200bp)1 (200bp)3 (200bp)1 (200bp)3 (200bp)1 (200bp)3 (200bp)

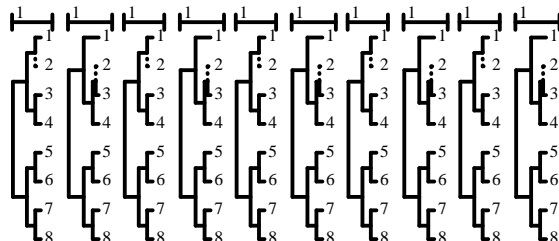

| Classification | Count | Better or Equal BIC/Delta(BIC) |
|----------------|-------|--------------------------------|
| Correct        | 30    | 30/18.55 ( 6.99,38.23)         |
| Subset         | 13    | 2/-20.33 (-97.58,10.71)        |
| Superset       | 9     | 7/17.53 (-4.98,36.90)          |
| Mismatch       | 48    | 25/ 5.07 (-153.13,38.18)       |

| Breakpoint | Times found/ Location (median, st.dev (2.5%-97.5%)) |
|------------|-----------------------------------------------------|
| 200bp 1:3  | 68/201,11.72 (176,235)                              |
| 400bp 3:1  | 62/403, 8.18 (391,420)                              |
| 600bp 1:3  | 68/601,14.69 (561,634)                              |
| 800bp 3:1  | 71/803,10.72 (783,838)                              |
| 1000bp 1:3 | 71/1001,10.95 (974,1021)                            |
| 1200bp 3:1 | 72/1203,13.14 (1177,1253)                           |
| 1400bp 1:3 | 75/1401,11.45 (1364,1414)                           |
| 1600bp 3:1 | 73/1602, 8.52 (1582,1626)                           |
| 1800bp 1:3 | 77/1801,13.40 (1746,1816)                           |

Figure S13: Scenario 6. Nine breakpoints/close

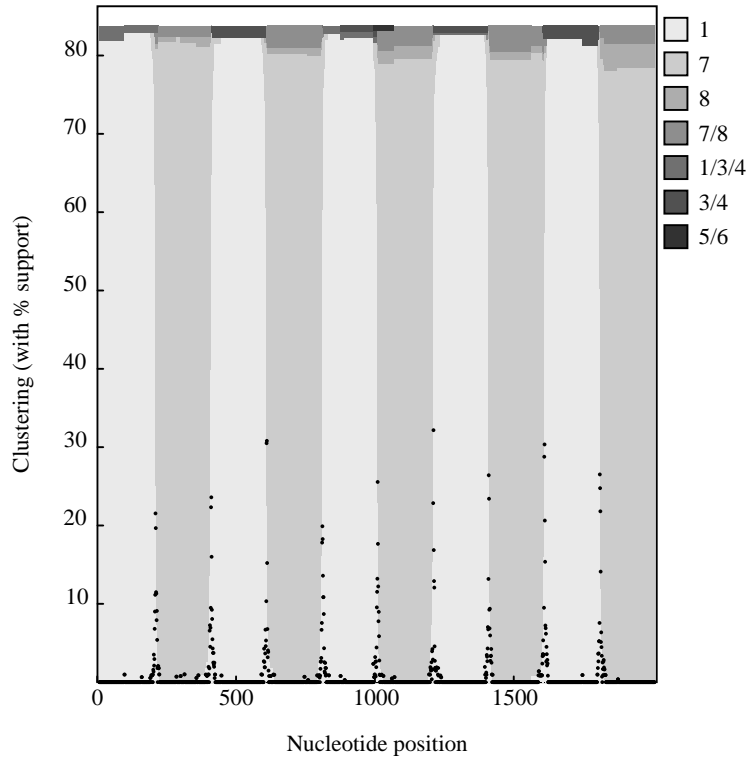

1 (200bp/7 (200bp)1 (200bp/7 (200bp)1 (200bp/7 (200bp)1 (200bp/7 (200bp)1 (200bp/7 (200bp)1 (200bp/7 (200bp)

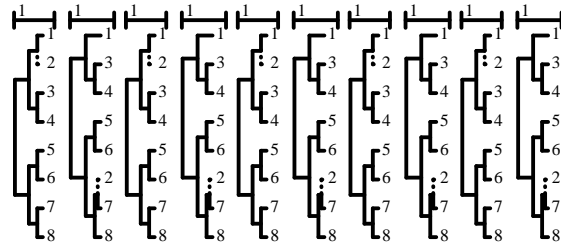

| Classification | Count | Better or Equal BIC/Delta(BIC) |
|----------------|-------|--------------------------------|
| Correct        | 64    | 64/12.81 ( -1.78,40.35)        |
| Subset         | 0     |                                |
| Superset       | 9     | 7/12.62 (-1.00,39.72)          |
| Mismatch       | 27    | 25/17.03 (-10.36,36.37)        |

| Breakpoint | Times found/ Location (median, st.dev (2.5%-97.5%)) |
|------------|-----------------------------------------------------|
| 200bp 1:7  | 96/202, 4.87 (188,212)                              |
| 400bp 7:1  | 94/402, 7.98 (386,415)                              |
| 600bp 1:7  | 93/601, 5.95 (591,625)                              |
| 800bp 7:1  | 93/802, 5.37 (790,815)                              |
| 1000bp 1:7 | 92/1002, 5.35 (985,1015)                            |
| 1200bp 7:1 | 93/1202, 6.17 (1191,1228)                           |
| 1400bp 1:7 | 93/1402, 4.52 (1391,1411)                           |
| 1600bp 7:1 | 93/1602, 4.05 (1594,1612)                           |
| 1800bp 1:7 | 89/1802, 3.80 (1794,1814)                           |

Figure S14: Scenario 6. Nine breakpoints/divergent

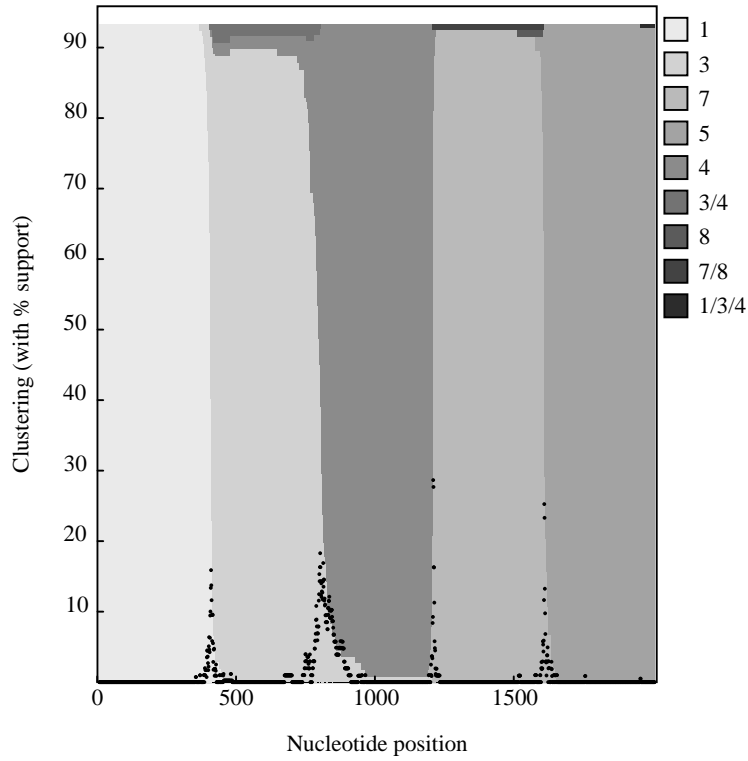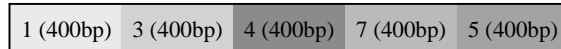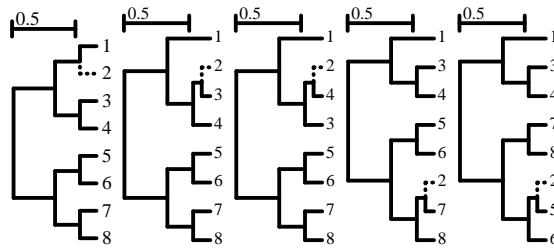

| Classification | Count | Better or Equal BIC/Delta(BIC) |
|----------------|-------|--------------------------------|
| Correct        | 88    | 86/ 7.24 ( 0.36,21.66)         |
| Subset         | 3     | 1/-2.90 (-19.55, 2.77)         |
| Superset       | 5     | 4/ 5.69 (-0.79,10.58)          |
| Mismatch       | 4     | 4/ 3.85 ( 1.52,10.41)          |

| Breakpoint | Times found/ Location (median, st.dev (2.5%-97.5%)) |
|------------|-----------------------------------------------------|
| 400bp 1:3  | 94/400,11.89 (375,440)                              |
| 800bp 3:4  | 89/793,28.29 (737,853)                              |
| 1200bp 4:7 | 98/1202, 4.02 (1192,1211)                           |
| 1600bp 7:5 | 98/1601.5,11.08 (1586,1640)                         |

Figure S15: Scenario 7. Complex mosaic



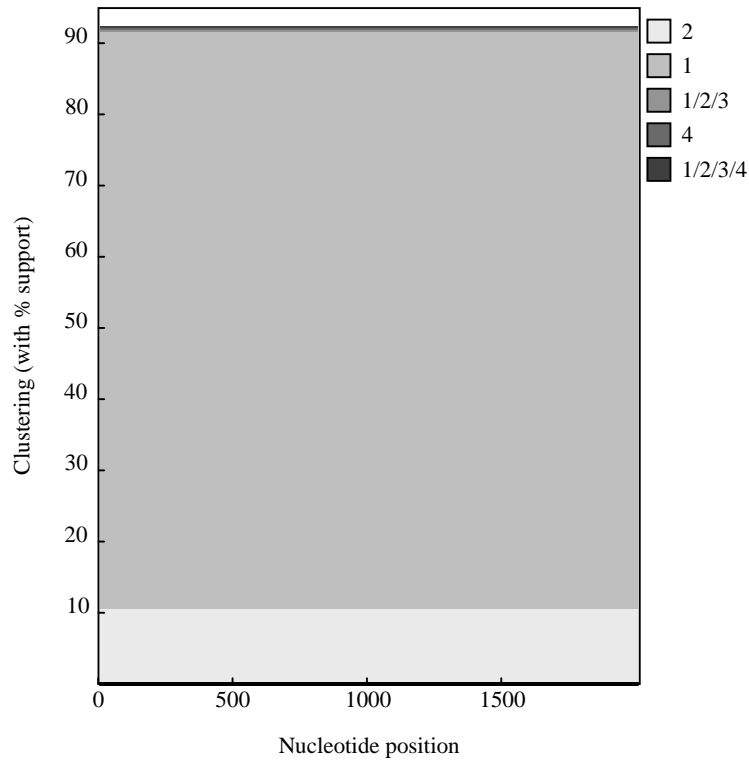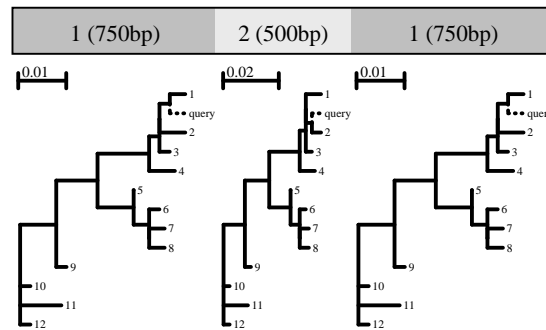

| Classification | Count | Better or Equal BIC/Delta(BIC) |
|----------------|-------|--------------------------------|
| Correct        | 0     |                                |
| Subset         | 96    | 96/59.53 (30.53,71.19)         |
| Superset       | 0     |                                |
| Mismatch       | 4     | 4/70.57 (58.68,71.30)          |

| Breakpoint | Times found/ Location (median, st.dev (2.5%-97.5%)) |
|------------|-----------------------------------------------------|
| 750bp 1:2  |                                                     |
| 1250bp 2:1 |                                                     |

Figure S16: Scenario 8. HIV within-patient 2 breakpoints /close

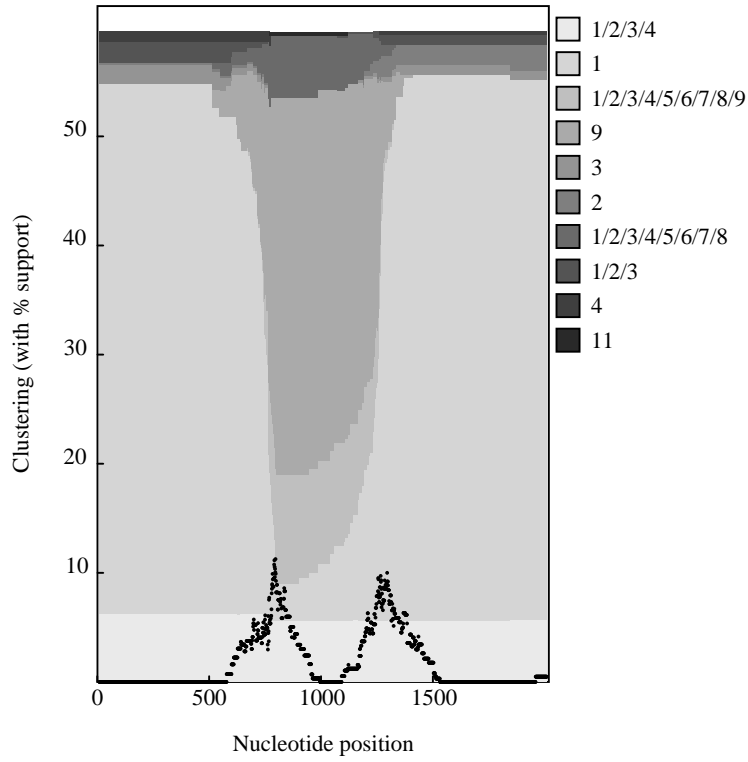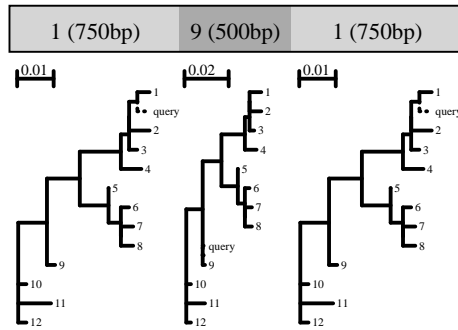

| Classification | Count | Better or Equal BIC/Delta(BIC) |
|----------------|-------|--------------------------------|
| Correct        | 38    | 36/ 0.85 (-0.20, 9.06)         |
| Subset         | 4     | 2/-5.77 (-33.15,27.40)         |
| Superset       | 1     | 1/ 0.22 ( 0.22, 0.22)          |
| Mismatch       | 57    | 55/ 3.12 (-2.56,34.19)         |

| Breakpoint | Times found/ Location (median, st.dev (2.5%-97.5%)) |
|------------|-----------------------------------------------------|
| 750bp 1:9  | 38/741 5.34.62 (666,790)                            |
| 1250bp 9:1 | 39/1256,36.11 (1156,1326)                           |

Figure S17: Scenario 8. HIV within-patient 2 breakpoints /divergent

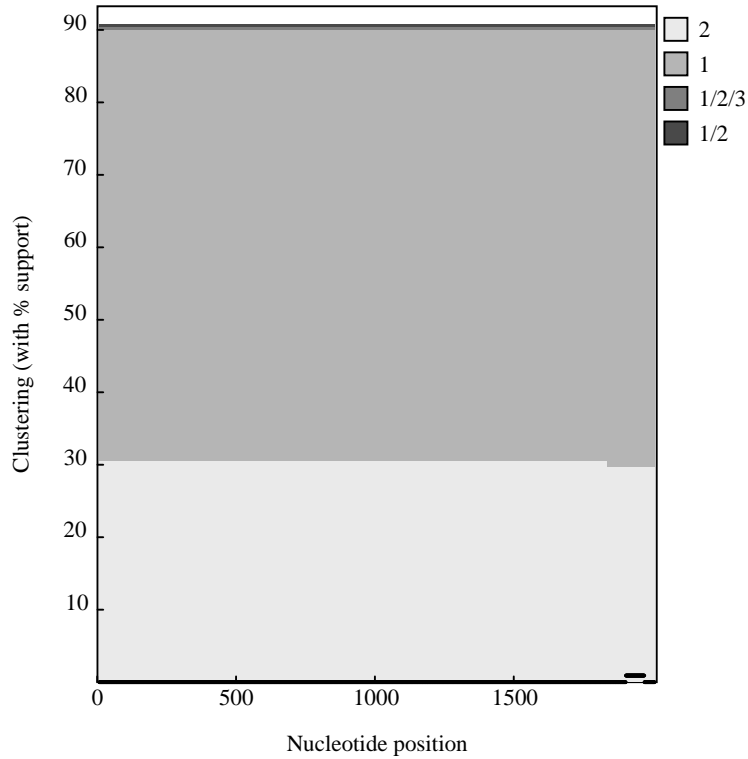

1 (400bp)    2 (400bp)    1 (400bp)    2 (450bp)    1 (350bp)

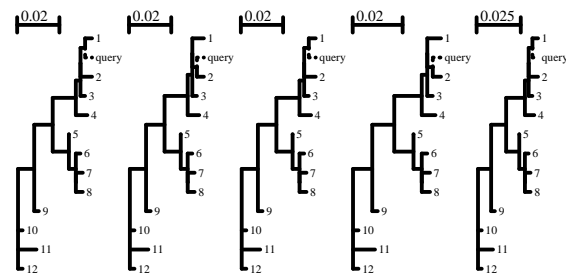

| Classification | Count | Better or Equal BIC/Delta(BIC) |
|----------------|-------|--------------------------------|
| Correct        | 0     |                                |
| Subset         | 97    | 97/97.20 (66.85,112.87)        |
| Superset       | 0     |                                |
| Mismatch       | 3     | 3/110.97 (108.69,111.31)       |

| Breakpoint | Times found/ Location (median, st.dev (2.5%-97.5%)) |
|------------|-----------------------------------------------------|
| 400bp 1:2  |                                                     |
| 800bp 2:1  |                                                     |
| 1200bp 1:2 |                                                     |
| 1650bp 2:1 |                                                     |

Figure S18: Scenario 9. HIV within-patient 4 breakpoints/close

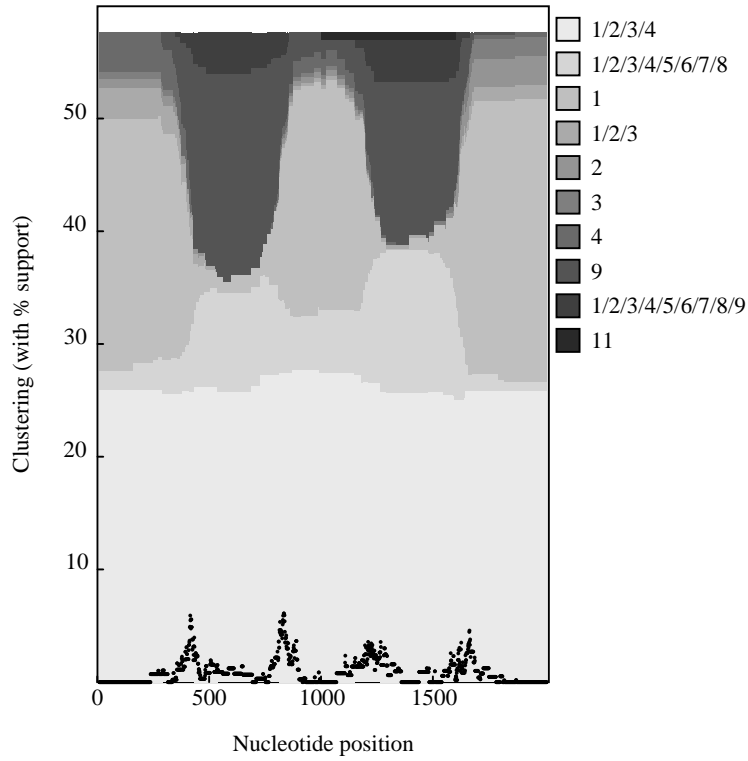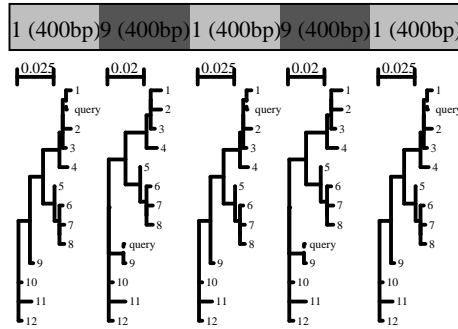

| Classification | Count | Better or Equal BIC/Delta(BIC) |
|----------------|-------|--------------------------------|
| Correct        | 7     | 7/ 1.89 ( 1.00,11.18)          |
| Subset         | 2     | 1/ 8.45 (-12.30,29.19)         |
| Superset       | 1     | 0/ -9.23 (-9.23,-9.23)         |
| Mismatch       | 90    | 70/ 5.64 (-43.44,46.21)        |

| Breakpoint | Times found/ Location (median, st.dev (2.5%-97.5%)) |
|------------|-----------------------------------------------------|
| 400bp 1:9  | 16/391.5,32.00 (349,475)                            |
| 800bp 9:1  | 21/808,39.70 (730,868)                              |
| 1200bp 1:9 | 22/1202.5,42.90 (1118,1284)                         |
| 1600bp 9:1 | 20/1610.5,32.87 (1551,1676)                         |

Figure S19: Scenario 9. HIV within-patient 4 breakpoints/divergent

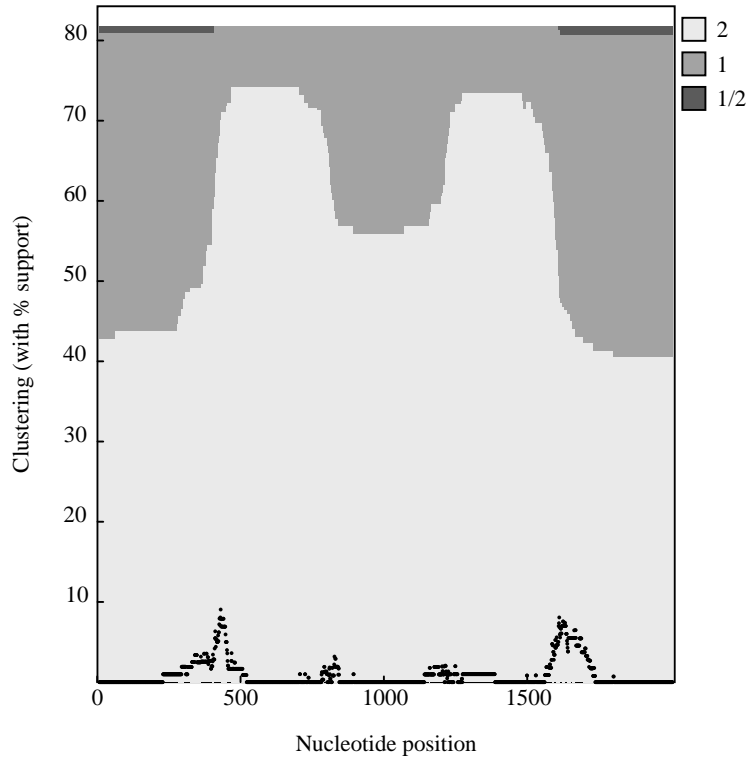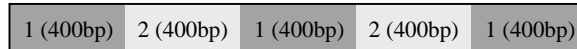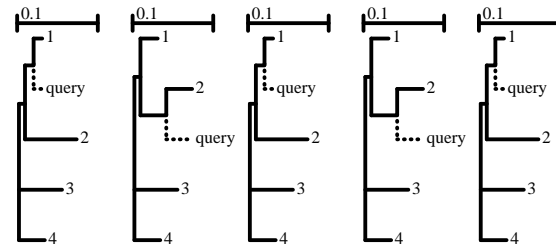

| Classification | Count | Better or Equal BIC/Delta(BIC) |
|----------------|-------|--------------------------------|
| Correct        | 16    | 16/ 8.63 ( 0.52,27.53)         |
| Subset         | 80    | 77/22.80 (-1.94,54.31)         |
| Superset       | 0     |                                |
| Mismatch       | 4     | 4/15.02 ( 8.96,28.68)          |

| Breakpoint | Times found/ Location (median, st.dev (2.5%-97.5%)) |
|------------|-----------------------------------------------------|
| 400bp 1:2  | 30/402,31.53 (317,460)                              |
| 800bp 2:1  | 21/802,35.56 (716,885)                              |
| 1200bp 1:2 | 20/1209,30.18 (1151,1266)                           |
| 1600bp 2:1 | 35/1589,38.80 (1506,1689)                           |

Figure S20: Scenario 10. HIV intra-subtype

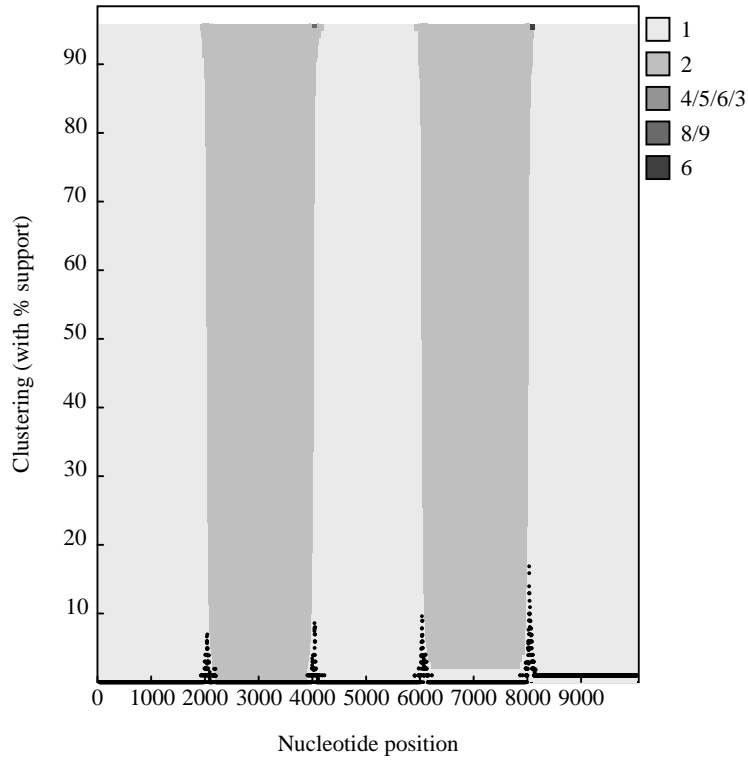

1 (2000bp) 2 (2000bp) 1 (2000bp) 2 (2000bp) 1 (2000bp)

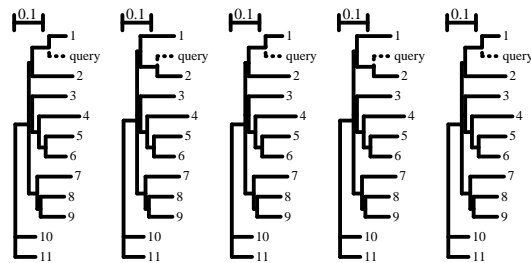

| Classification | Count | Better or Equal BIC/Delta(BIC) |
|----------------|-------|--------------------------------|
| Correct        | 95    | 95/ 9.42 ( 0.38,23.26)         |
| Subset         | 1     | 0/-173.84 (-173.84,-173.84)    |
| Superset       | 2     | 2/17.40 (10.40,24.39)          |
| Mismatch       | 2     | 2/ 6.42 ( 5.98, 6.85)          |

| Breakpoint | Times found/ Location (median, st.dev (2.5%-97.5%)) |
|------------|-----------------------------------------------------|
| 2000bp 1:2 | 94/2002.5,30.11 (1925,2092)                         |
| 4000bp 2:1 | 93/4000,29.62 (3928,4085)                           |
| 6000bp 1:2 | 94/6002.5,26.99 (5941,6067)                         |
| 8000bp 2:1 | 92/7996,33.39 (7929,8078)                           |

Figure S21: Scenario 11. HIV mosaic/close

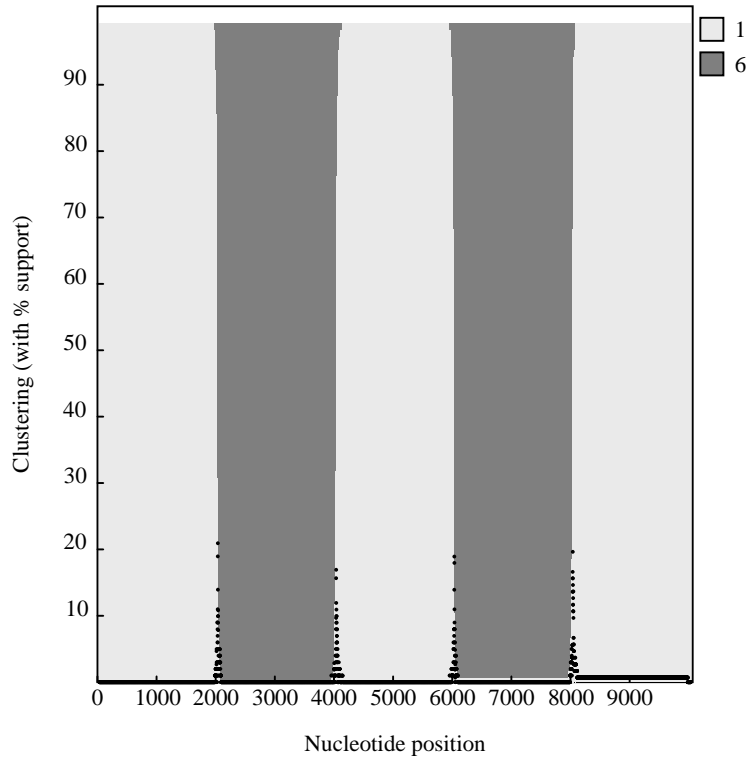

1 (2000bp) 6 (2000bp) 1 (2000bp) 6 (2000bp) 1 (2000bp)

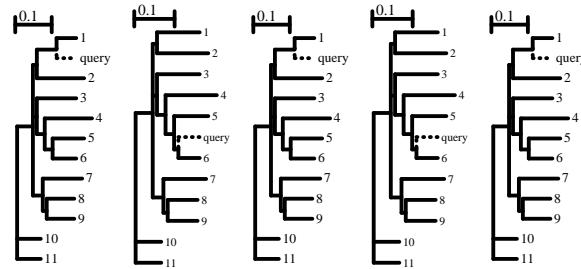

| Classification | Count | Better or Equal BIC/Delta(BIC) |
|----------------|-------|--------------------------------|
| Correct        | 100   | 100/ 6.61 ( 0.34,19.94)        |
| Subset         | 0     |                                |
| Superset       | 0     |                                |
| Mismatch       | 0     |                                |

| Breakpoint | Times found/ Location (median, st.dev (2.5%-97.5%)) |
|------------|-----------------------------------------------------|
| 2000bp 1:6 | 100/2000,17.40 (1959,2042)                          |
| 4000bp 6:1 | 99/4003,21.62 (3964,4053)                           |
| 6000bp 1:6 | 100/6001,18.61 (5952,6040)                          |
| 8000bp 6:1 | 99/8004,16.88 (7968,8046)                           |

Figure S22: Scenario 11. HIV mosaic/medium

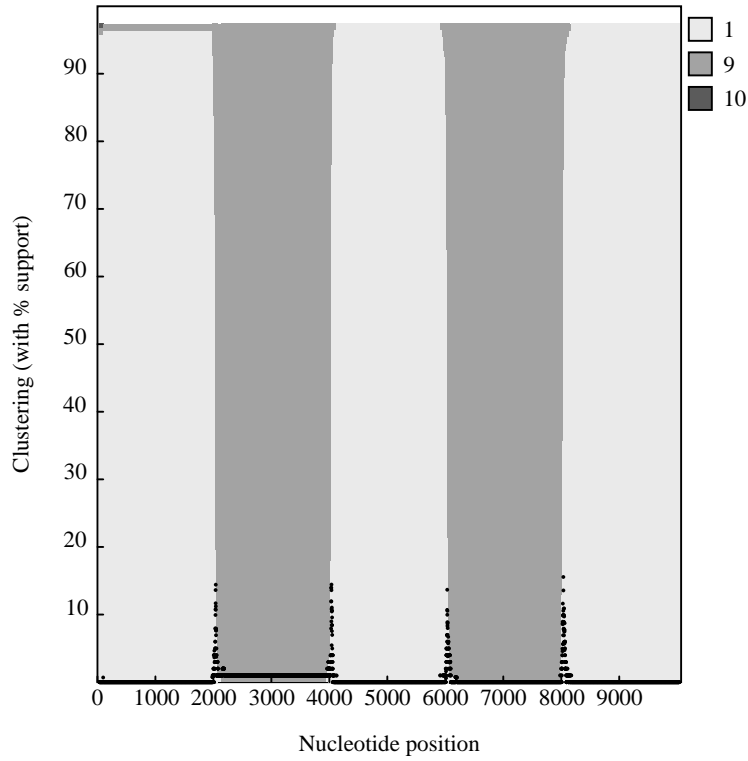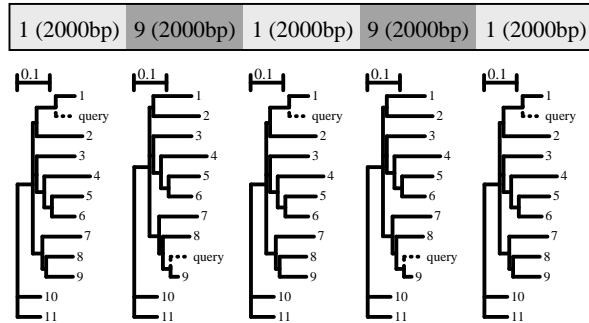

| Classification | Count | Better or Equal BIC/Delta(BIC) |
|----------------|-------|--------------------------------|
| Correct        | 99    | 97/ 5.95 ( 0.12,19.81)         |
| Subset         | 0     |                                |
| Superset       | 1     | 1/ 2.81 ( 2.81, 2.81)          |
| Mismatch       | 0     |                                |

| Breakpoint | Times found/ Location (median, st.dev (2.5%-97.5%)) |
|------------|-----------------------------------------------------|
| 2000bp 1:9 | 99/2002,20.92 (1956,2043)                           |
| 4000bp 9:1 | 100/4002,5,19,85 (3945,4056)                        |
| 6000bp 1:9 | 98/6000,21.89 (5937,6042)                           |
| 8000bp 9:1 | 99/7999,22.49 (7953,8070)                           |

Figure S23: Scenario 11. HIV mosaic/divergent



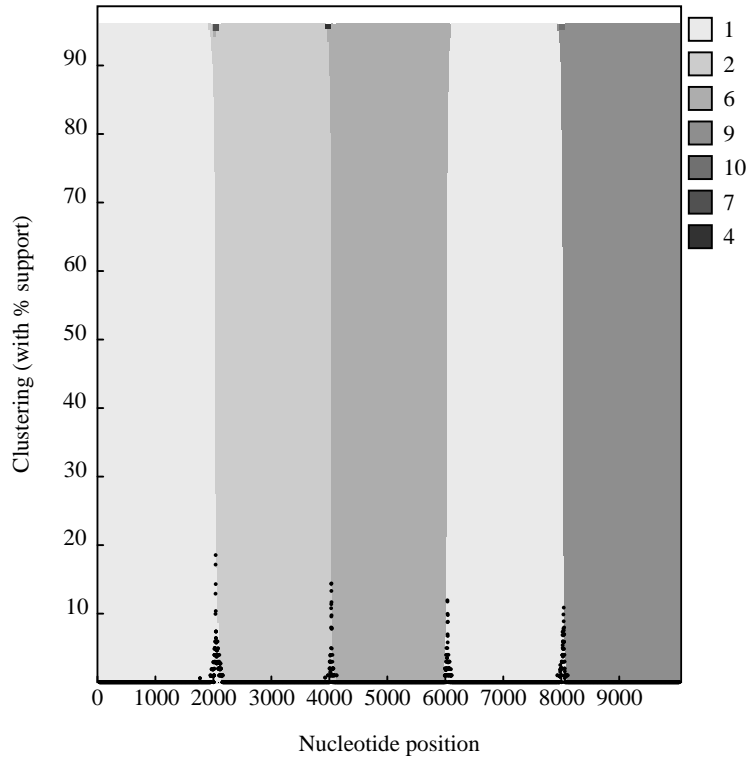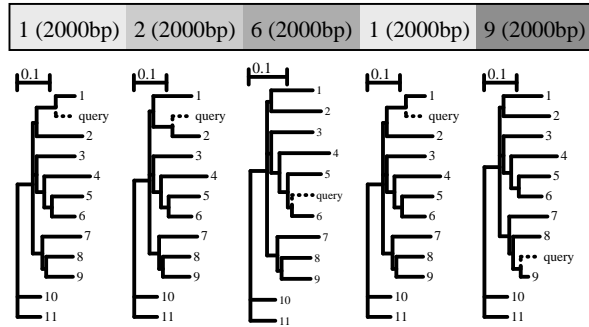

| Classification | Count | Better or Equal BIC/Delta(BIC) |
|----------------|-------|--------------------------------|
| Correct        | 94    | 93/ 7.37 ( 0.59,21.03)         |
| Subset         | 0     |                                |
| Superset       | 5     | 4/11.45 (-15.67,19.90)         |
| Mismatch       | 1     | 1/19.08 (19.08,19.08)          |

| Breakpoint | Times found/ Location (median, st.dev (2.5%-97.5%)) |
|------------|-----------------------------------------------------|
| 2000bp 1:2 | 96/2003,27.61 (1940,2070)                           |
| 4000bp 2:6 | 99/4000,18.14 (3969,4053)                           |
| 6000bp 6:1 | 100/6003,20.35 (5959,6068)                          |
| 8000bp 1:9 | 97/8000,21.34 (7947,8062)                           |

Figure S24: Scenario 11. HIV mosaic/complex
